# Supplementary material
Source: PubMed Central journal article supplement (PMC7513369)
Supplement: ao0c03019_si_001.pdf [file ao0c03019_si_001.pdf]

# Rational design of W-doped $\text{Ag}_3\text{PO}_4$ as an efficient antibacterial agent and photocatalyst for organic pollutants degradation

*Aline B. Trench,<sup>†\*</sup> Thales R. Machado,<sup>†\*</sup> Amanda F. Gouveia,<sup>‡</sup> Camila C. Foggi,<sup>†</sup> Vinicius Teodoro,<sup>†</sup> Isaac Sánchez-Montes,<sup>†</sup> Mayara M. Teixeira,<sup>†</sup> Leticia G. Trindade,<sup>‡</sup> Natalia Jacomaci,<sup>↔</sup> Andre Perrin,<sup>⊥</sup> Christiane Perrin,<sup>⊥</sup> Jose M. Aquino,<sup>†</sup> Juan Andrés,<sup>⊥</sup> Elson Longo<sup>†\*</sup>*

<sup>†</sup> CDMF – Department of Chemistry, Federal University of São Carlos, 13565-905, São Carlos, SP, Brazil.

<sup>‡</sup> Institute of Chemistry, State University of Campinas, 13083-970, Campinas, SP, Brazil.

<sup>‡</sup> Department of Chemistry, São Paulo State University, 17033-360, Bauru, SP, Brazil.

<sup>↔</sup> Chemistry Institute, São Paulo State University, 14800-060, Araraquara, SP, Brazil.

<sup>⊥</sup> University of Rennes 1, Campus de Beaulieu, F-35042, Rennes-Cedex, France.

<sup>⊥</sup> Department of Analytical and Physical Chemistry, University Jaume I, 12071, Castellón, Spain.

## Corresponding Author

\* E-mail: [aline\\_trench@hotmail.com](mailto:aline_trench@hotmail.com) (A.B. Trench)

\*E-mail: [tmachado.quimica@gmail.com](mailto:tmachado.quimica@gmail.com) (T.R. Machado)

\*E-mail: [elson.liec@gmail.com](mailto:elson.liec@gmail.com) (E. Longo)

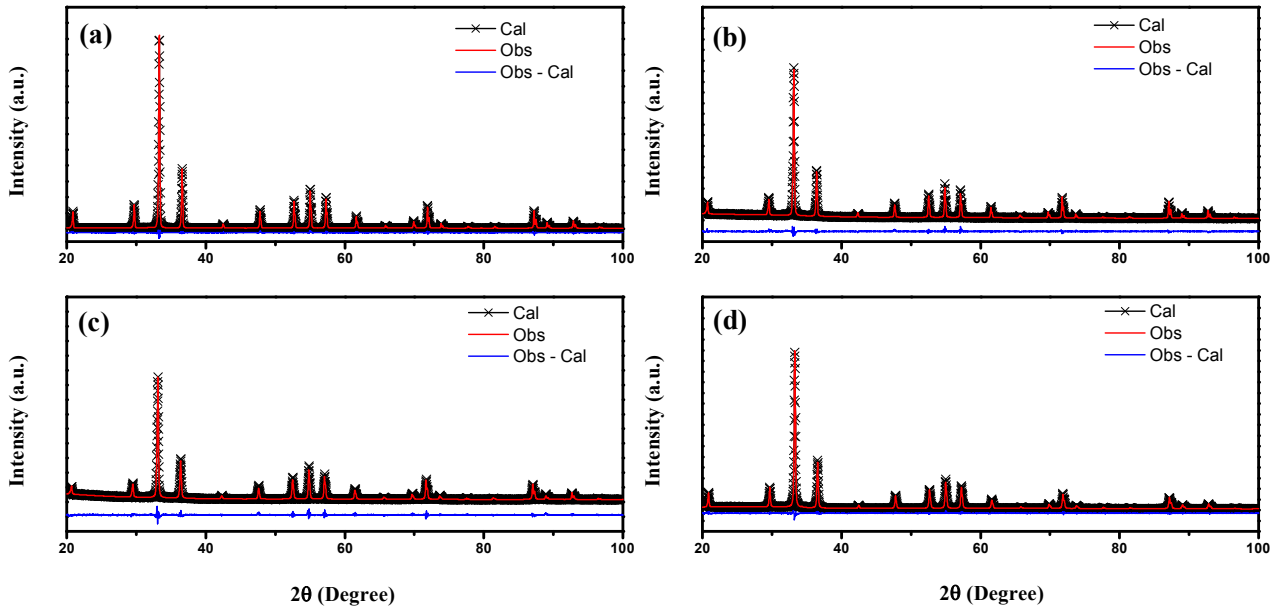

**Figure S1.** Rietveld refinement plots of pure  $\text{Ag}_3\text{PO}_4$  (a),  $\text{Ag}_3\text{PO}_4$ : W 0.5% (b),  $\text{Ag}_3\text{PO}_4$ :W 1% (c), and  $\text{Ag}_3\text{PO}_4$ :W 2% (d).

**Table S1.** Rietveld refinements of pure  $\text{Ag}_3\text{PO}_4$  and  $\text{Ag}_3\text{PO}_4$ :W powders.

| Sample                                     | Lattice Parameters     | Cell volume ( $\text{\AA}^3$ ) | $R_{\text{Bragg}}$ | $\chi^2$ | $R_{\text{wp}}$ | $R_{\text{p}}$ |
|--------------------------------------------|------------------------|--------------------------------|--------------------|----------|-----------------|----------------|
|                                            | a=b=c ( $\text{\AA}$ ) |                                |                    |          |                 |                |
| <b><math>\text{Ag}_3\text{PO}_4</math></b> | 6.015570(18)           | 217.6860(20)                   | 0.0605             | 2.36     | 8.75            | 6.43           |
| <b>W 0.5%</b>                              | 6.01740(4)             | 217.885(5)                     | 0.0636             | 1.72     | 6.38            | 4.82           |
| <b>W 1%</b>                                | 6.01839(7)             | 217.992(8)                     | 0.0651             | 1.95     | 7.45            | 5.52           |
| <b>W 2%</b>                                | 6.01685(15)            | 217.825(16)                    | 0.0473             | 2.38     | 6.28            | 4.79           |

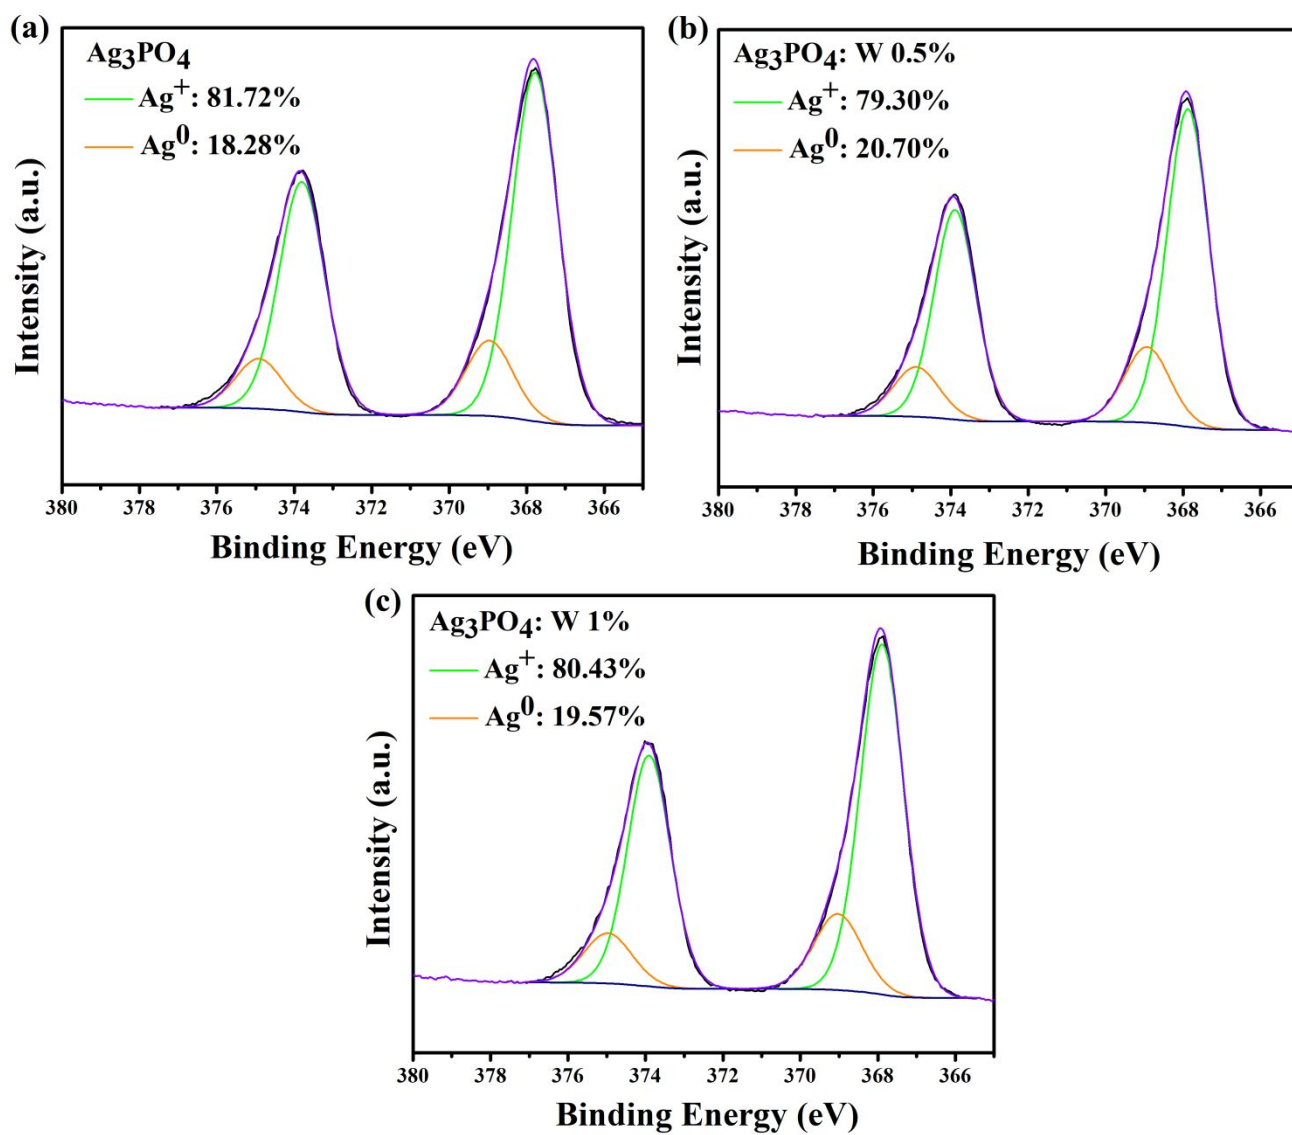

**Figure S2.** High-resolution XPS spectra of Ag 3d for Ag<sub>3</sub>PO<sub>4</sub>, Ag<sub>3</sub>PO<sub>4</sub>: W 0.5%, and Ag<sub>3</sub>PO<sub>4</sub>: W 1% samples.

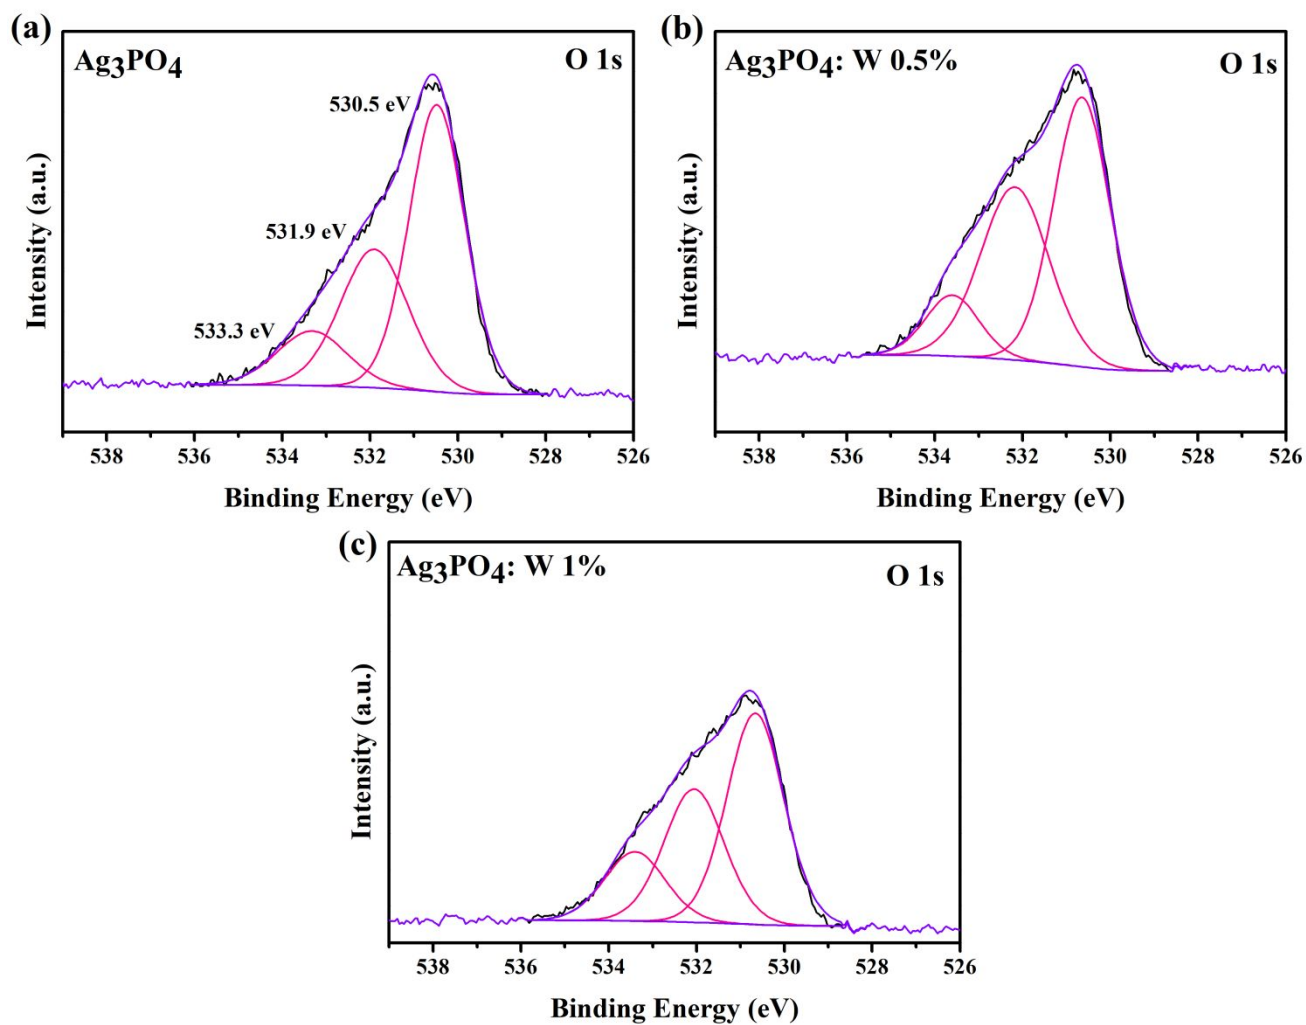

**Figure S3.** XPS spectrum of O 1s for pure Ag<sub>3</sub>PO<sub>4</sub> (a), Ag<sub>3</sub>PO<sub>4</sub>:W 0.5% (b), and Ag<sub>3</sub>PO<sub>4</sub>:W1% (c) samples.

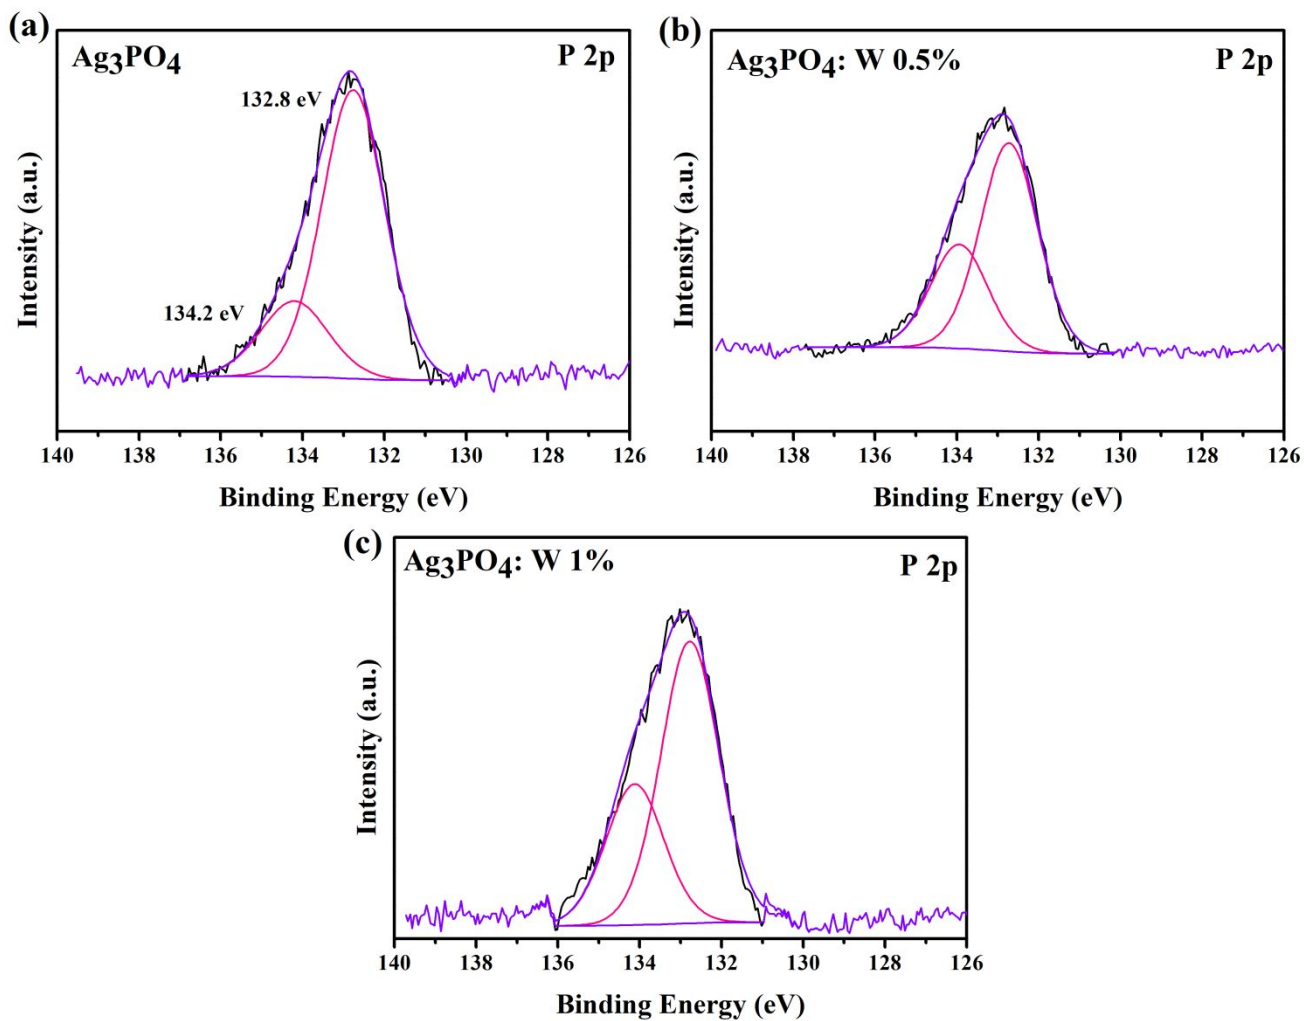

**Figure S4.** XPS spectrum of P 2p for pure Ag<sub>3</sub>PO<sub>4</sub> (a), Ag<sub>3</sub>PO<sub>4</sub>:W 0.5% (b), and Ag<sub>3</sub>PO<sub>4</sub>:W 1% (c) samples.

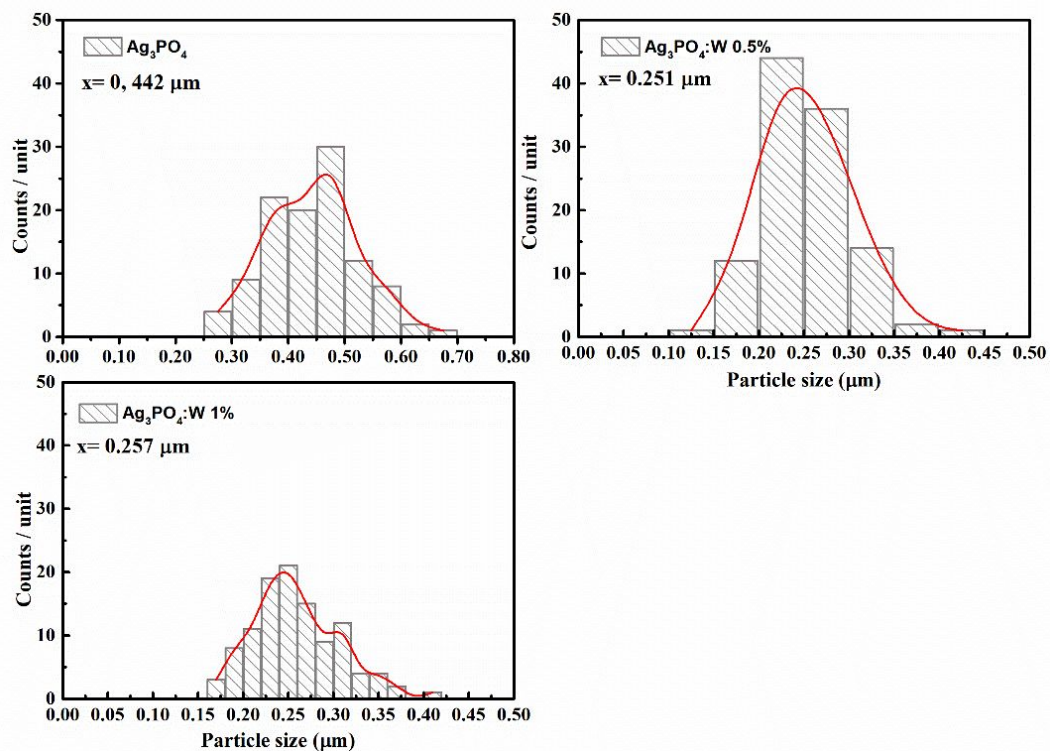

**Figure S5.** Particle size distribution for  $\text{Ag}_3\text{PO}_4$ ,  $\text{Ag}_3\text{PO}_4\text{:W } 0.5\%$ , and  $\text{Ag}_3\text{PO}_4\text{:W } 1\%$ .

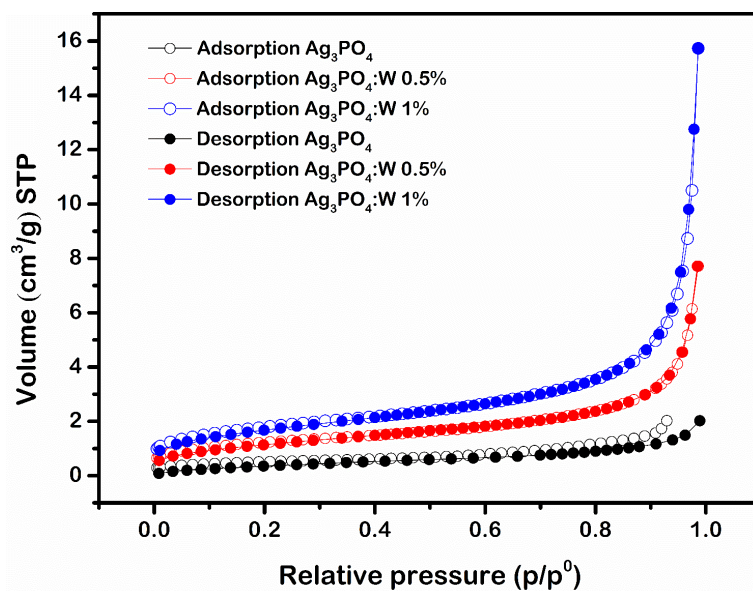

**Figure S6.** Adsorption-desorption isotherms of  $\text{Ag}_3\text{PO}_4$ ,  $\text{Ag}_3\text{PO}_4\text{:W } 0.5\%$ , and  $\text{Ag}_3\text{PO}_4\text{:W } 1\%$ .

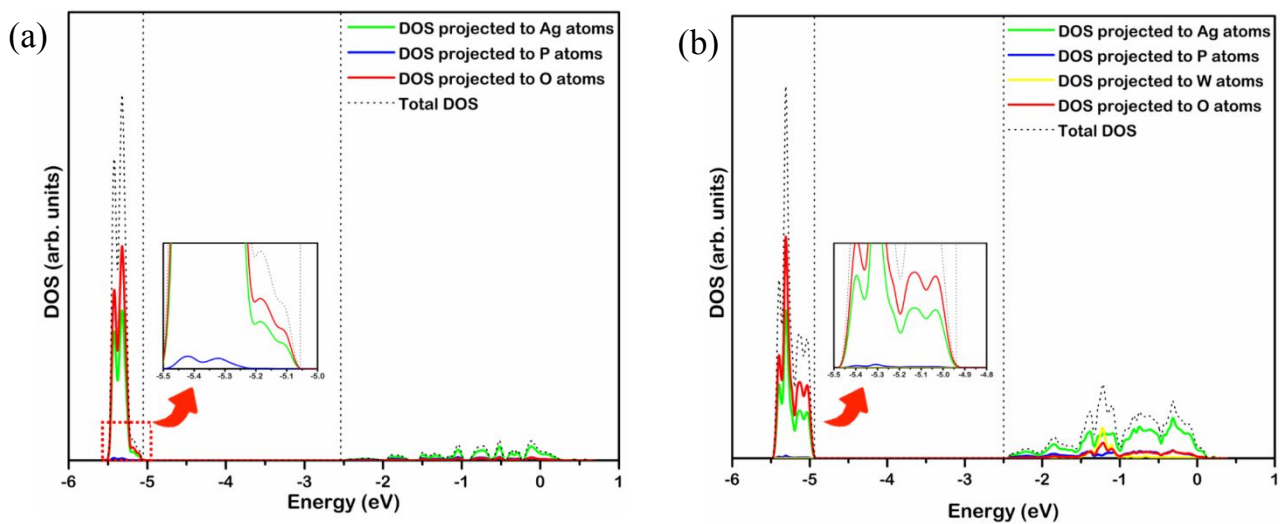

**Figure S7.** Density of states projected to the Ag, P and O atoms on the (a)  $\text{Ag}_3\text{PO}_4$  and (b)  $\text{Ag}_3\text{PO}_4:\text{W}$  models.
